# Supplementary material for: Expression of DAI by an oncolytic vaccinia virus boosts the immunogenicity of the virus and enhances antitumor immunity
Source: PubMed Central journal article supplement — Mol Ther Oncolytics. 2016 Mar 23;3:16002–. doi: 10.1038/mto.2016.2 (PMC5008257; doi:10.1038/mto.2016.2), 2016-03-23

## Supplementary Figures

**Supplementary Figure S1. Consistency of the effects promoted by viruses in the two different cell lines (THP-1 and HS294T).** Differentially expressed genes were plotted in a two dimensional chart to assess the rigorousness of our analysis.

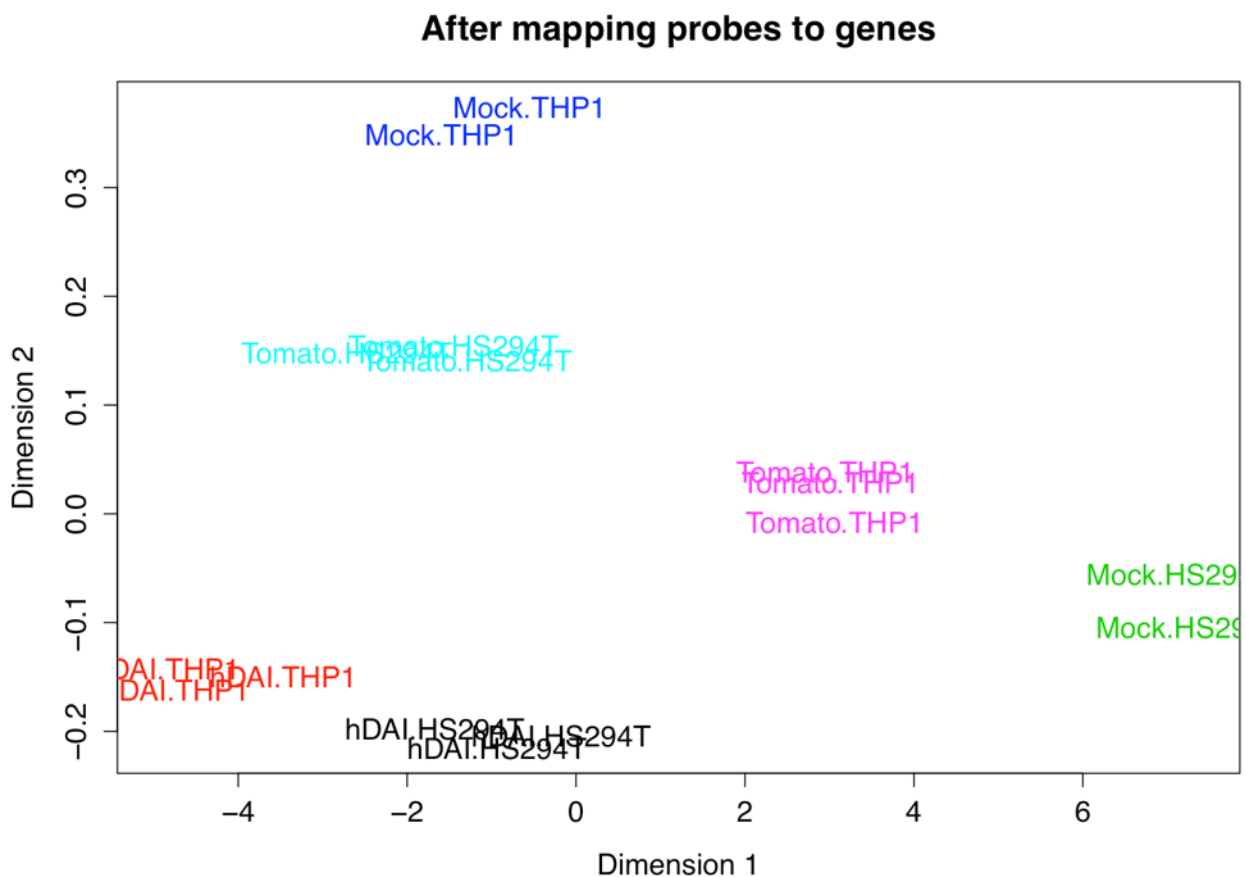

**Supplementary Figure S2. Differently regulated pathways between vvdd-tdTomato and vvdd-tdTomato-hDAI infected THP-1 cells.** IPA (Ingenuity Pathway Analysis) revealed the most differently regulated gene groups to belong to important immunological pathways.

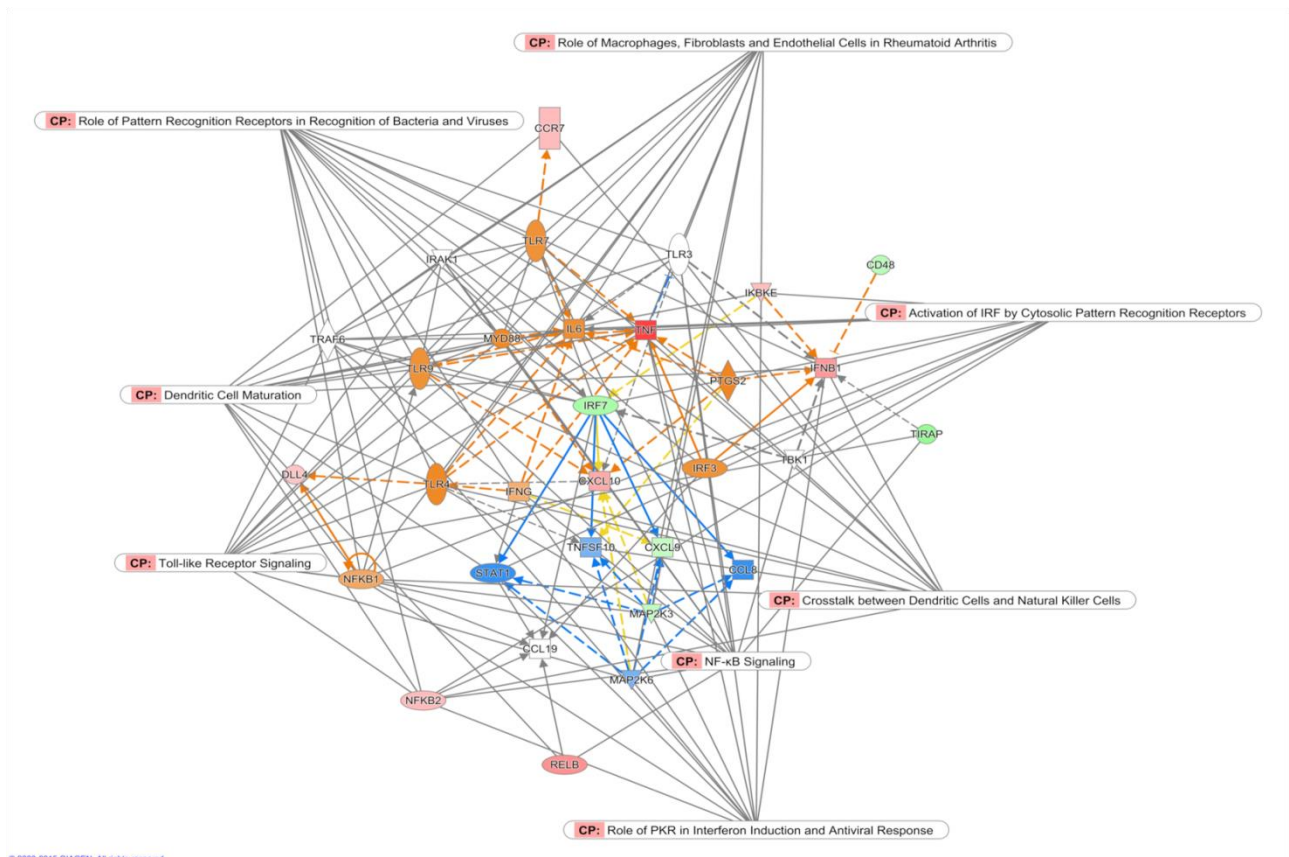

**Supplementary Figure S3.** Representative pictures of the ELISpot wells of **A)** B16-OVA re-challenged mice and **B)** B16-F10 re-challenged mice. The amount of activated, interferon gamma producing T-cells was studied from spleens of treated mice using a Mouse IFN- $\gamma$  ELISpot<sup>PLUS</sup> (ALP) kit. Splenocytes were pulsed with PepMix<sup>TM</sup> VACV (vaccinia virus) peptide pool, ovalbumin peptide SIINFEKL, gp100 peptide KVPRNQDWL or TRP-2 peptide SVYDFFVWL.

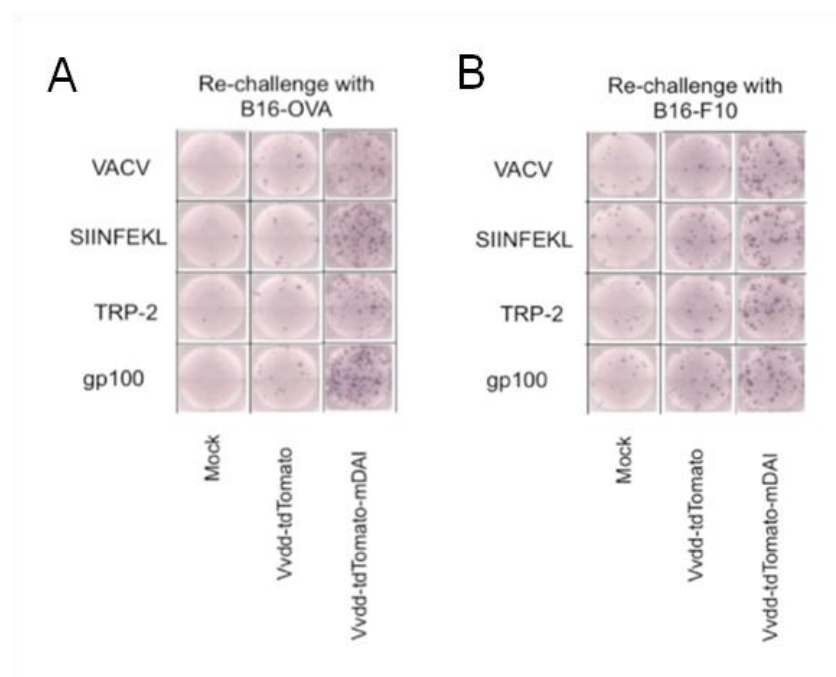

Supplement: mto20162-s1.pdf [file mto20162-s1.pdf]
